# Supplementary material
Source: Springer Nature journal article supplement (https://www.springermedizin.de/resource/supplementary/12902_2012_123_MOESM3_ESM.pdf/9515594)

# All-cause mortality

Odds ratio and 95% CI

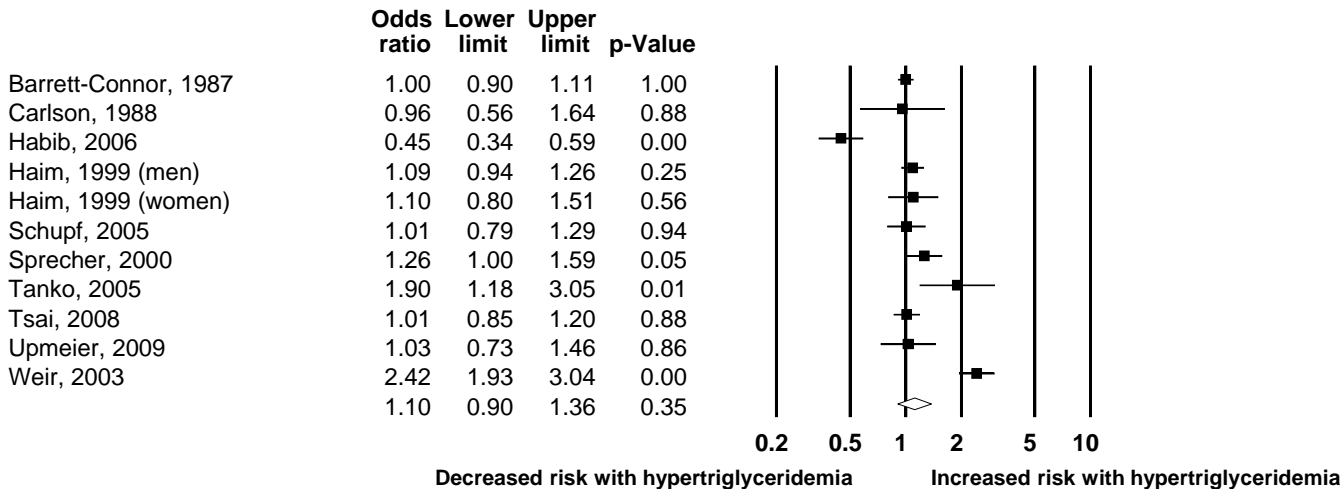

Supplement: MOESM3 [file 9515594]
